# Supplementary material for: Crystal structures of the new fluorophosphates Li9Mg3[PO4]4F3 and Li2Mg[PO4]F and ionic conductivities of selected compositions
Source: Royal Society of Chemistry journal article supplement (doi:10.1039/c3ta15264b), 2014-01-01
Supplement: c3ta15264b1.pdf [file c3ta15264b1.pdf]

## Supplementary information

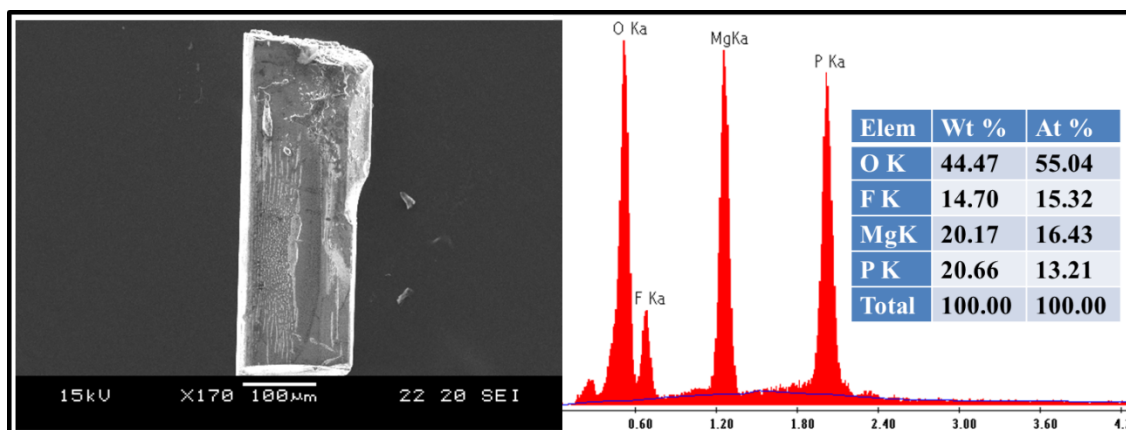

**Figure S1.** SEM images and EDX analyses of the  $\text{Li}_2\text{Mg}[\text{PO}_4]\text{F}$  single crystal used for the data collection.

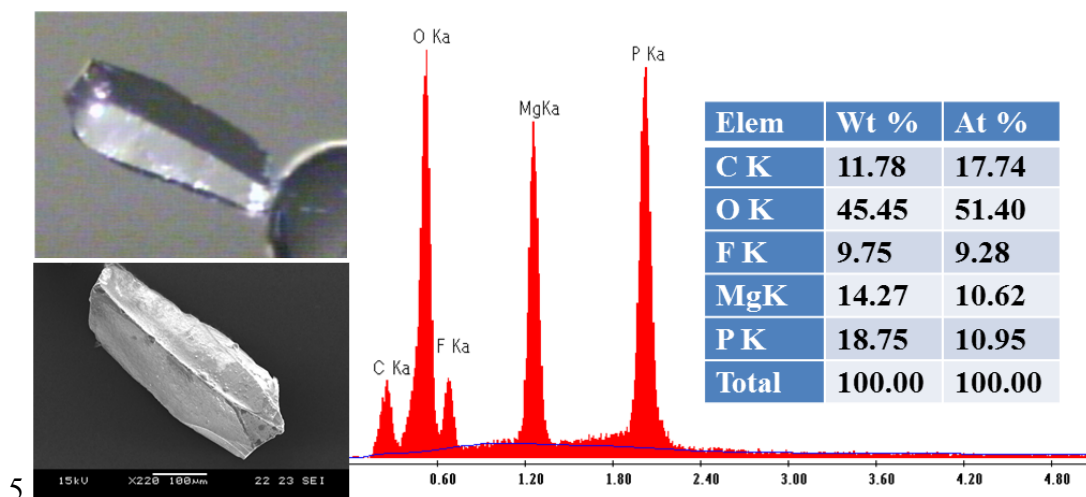

**Figure S2.** SEM and CCD images, and EDX analyses of the  $\text{Li}_9\text{Mg}_3[\text{PO}_4]_4\text{F}_3$  single crystal used for the data collection.

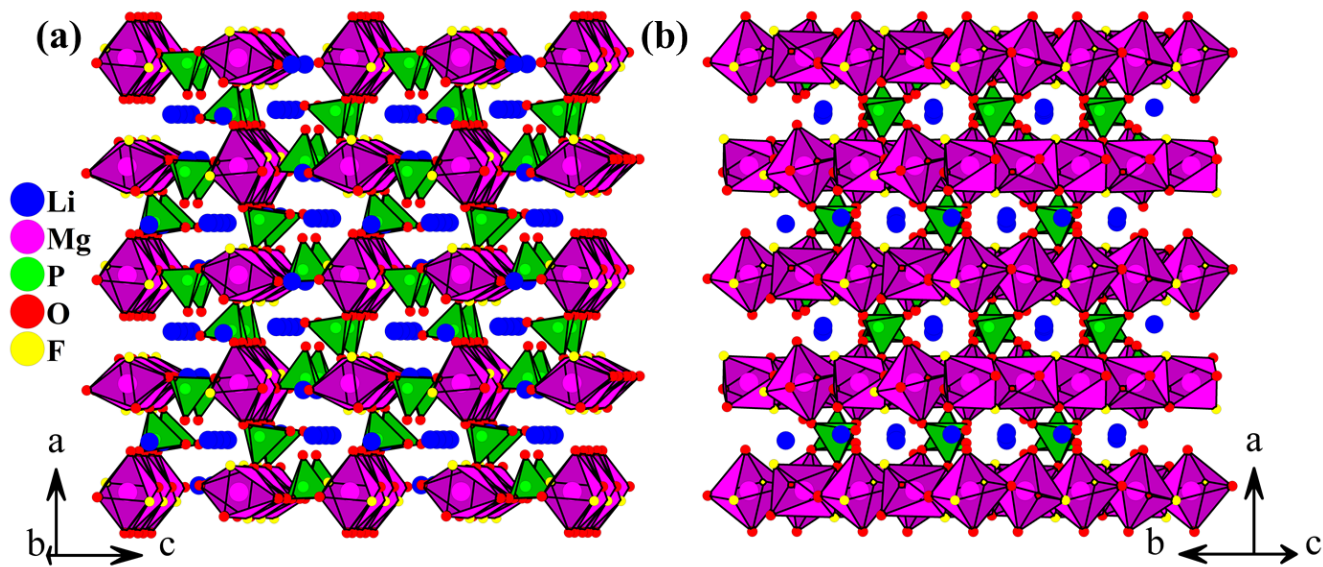

**Figure S3.** Views of the tunnels running along the [010] (a), and [011] directions (b).

| $\text{Li}_2\text{Ni}[\text{PO}_4]\text{F}:\text{Li}_4\text{Ni}_2[\text{PO}_4]_2\text{F}_2$ | Li1               | Li2               | Li3               | Ni1               | Ni2               | P1                | P2                | O1                | O2                | O3                | O4                | O5                | O6                | F1                | F2                |
|---------------------------------------------------------------------------------------------|-------------------|-------------------|-------------------|-------------------|-------------------|-------------------|-------------------|-------------------|-------------------|-------------------|-------------------|-------------------|-------------------|-------------------|-------------------|
| <i>Pmma</i> (no. 62)                                                                        | 8d                | 4c                | 4c                | 4a                | 4b                | 4c                | 4c                | 8d                | 4c                | 4c                | 4c                | 4c                | 8d                | 4c                | 4c                |
| $a = 10.4730 \text{ \AA}$                                                                   | 0.240             | 0.271             | 0.027             | 0                 | 0                 | 0.0236            | 0.2432            | 0.1891            | 0.2184            | 0.1694            | 0.3890            | 0.4739            | 0.0320            | 0.1272            | 0.4503            |
| $b = 6.2887 \text{ \AA}$                                                                    | 0.012             | 1/4               | 1/4               | 0                 | 0                 | 1/4               | 1/4               | 0.0494            | 1/4               | 1/4               | 1/4               | 1/4               | 0.5517            | 1/4               | 1/4               |
| $c = 10.8460 \text{ \AA}$                                                                   | 0.335             | 0.582             | 0.27              | 0                 | 1/2               | 0.7441            | 0.0781            | 0.0150            | 0.2167            | 0.7440            | 0.0522            | 0.6215            | 0.3195            | 0.4729            | 0.3838            |
|                                                                                             | $\leftrightarrow$ |
| $\square_2\text{Mg}_{1-x}\text{Fe}_x\text{Al}_3[\text{BO}_3][\text{SiO}_4]\text{O}_2$       | Mg1               | Al3               | Al1               | Al2               | B                 | Si                | O6                | O1                | O3                | O7                | O5                | O2                | O4                | O5                | O2                |
| <i>Pmma</i> (no. 62)                                                                        | 4c                | 4c                | 4a                | 4b                | 4c                | 4c                | 8d                | 4c                | Vacant            | 8d                | 4c                | 4c                | 4c                | 8d                | 4c                |
| $a = 10.990 \text{ \AA}$                                                                    | 0.2812            | 0.0522            | 0                 | 0                 | 0.0003            | 0.2367            | 0.1703            | 0.2119            | 0.3789            | 0.4964            | -0.0019           | 0.0992            | 0.4782            | 0.0992            | 0.4782            |
| $b = 5.750 \text{ \AA}$                                                                     | 1/4               | 1/4               | 0                 | 0                 | 1/4               | 1/4               | 0.0239            | 1/4               | 1/4               | 1/4               | 1/4               | 1/4               | 1/4               | 0.5462            | 1/4               |
| $c = 10.34 \text{ \AA}$                                                                     | 0.4067            | 0.2738            | 0                 | 1/2               | 0.7492            | 0.0661            | 0.0077            | 0.2240            | 0.0263            | 0.6217            | 0.3196            | 0.4540            | 0.3813            | 0.4540            | 0.3813            |
|                                                                                             | $\leftrightarrow$ |

**Figure S4.** Comparison of the atomic positions in  $\text{Li}_2\text{Ni}[\text{PO}_4]\text{F}$  and  $\text{Mg}_{1-x}\text{Fe}_x\text{Al}_3[\text{BO}_3][\text{SiO}_4]\text{O}_2$  structures.

|                                                                                                                                                                                                     |                                         |                                         |                                         |                                         |                              |                                     |                                     |                                          |                                           |                                           |                                           |                                           |                                           |                                           |                                           |                                           |                                           |
|-----------------------------------------------------------------------------------------------------------------------------------------------------------------------------------------------------|-----------------------------------------|-----------------------------------------|-----------------------------------------|-----------------------------------------|------------------------------|-------------------------------------|-------------------------------------|------------------------------------------|-------------------------------------------|-------------------------------------------|-------------------------------------------|-------------------------------------------|-------------------------------------------|-------------------------------------------|-------------------------------------------|-------------------------------------------|-------------------------------------------|
| $\text{Li}_2\text{Ni}[\text{PO}_4]\text{F}$ subcell<br><i>Pmma</i> (no. 62)<br>$a_1 = 10.4730 \text{ \AA}$<br>$b_1 = 6.2887 \text{ \AA}$<br>$c_1 = 10.8460 \text{ \AA}$                             | Li1<br>8d<br>0.240<br>0.012<br>0.335    | Li2<br>4c<br>0.271<br>1/4<br>0.582      | Li3<br>4c<br>0.027<br>1/4<br>0.276      | Ni1<br>4a<br>0<br>0<br>0                | Ni2<br>4b<br>0<br>0<br>1/2   | P1<br>4c<br>0.0236<br>1/4<br>0.7441 | P2<br>4c<br>0.2432<br>1/4<br>0.0781 | O1<br>8d<br>0.1891<br>0.0494<br>0.0150   | O2<br>4c<br>0.2184<br>1/4<br>0.2167       | O3<br>4c<br>0.1694<br>1/4<br>0.7440       | O4<br>4c<br>0.3890<br>1/4<br>0.0522       | O5<br>4c<br>0.4739<br>1/4<br>0.6215       | O6<br>8d<br>0.0320<br>0.5517<br>0.3195    | F1<br>4c<br>0.1272<br>1/4<br>0.4729       | F2<br>4c<br>0.4503<br>1/4<br>0.3838       |                                           |                                           |
|                                                                                                                                                                                                     | Symmetry reduction<br>$I_2$             |                                         |                                         |                                         |                              |                                     |                                     |                                          |                                           |                                           |                                           |                                           |                                           |                                           |                                           |                                           |                                           |
| $\text{Li}_5\text{Ni}[\text{PO}_4]\text{F}$ supercell<br>$P1\ 2_1/c1$ (no. 14)<br>$a_2 = 6.2887 \text{ \AA}$<br>$b_2 = 10.8460 \text{ \AA}$<br>$c_2 = 10.4730 \text{ \AA}$<br>$\beta = 90.00^\circ$ | Li1_1<br>4e<br>0.488<br>0.335<br>0.26   | Li1_2<br>4e<br>0.012<br>0.25<br>0.335   | Li2<br>4e<br>0.25<br>0.582<br>0.229     | Ni1_1<br>2d<br>1/2<br>0<br>1/2          | Ni1_2<br>2b<br>0<br>0<br>0   | Ni2_1<br>2a<br>0<br>0<br>0          | Ni2_2<br>2a<br>0<br>0<br>0          | O1_1<br>4e<br>0.4506<br>0.0150<br>0.3109 | O1_2<br>4e<br>0.0494<br>0.0150<br>0.3109  | O2<br>4e<br>0.25<br>0.2167<br>0.2816      | O3<br>4e<br>0.75<br>0.2440<br>0.1694      | O4<br>4e<br>0.25<br>0.0522<br>0.1110      | O5<br>4e<br>0.25<br>0.6215<br>0.0261      | O6_1<br>4e<br>0.5517<br>0.3195<br>0.4680  | O6_2<br>4e<br>0.5517<br>0.3195<br>0.4680  | F1<br>4e<br>0.25<br>0.4729<br>0.3728      | F2<br>4e<br>0.25<br>0.3838<br>0.0497      |
|                                                                                                                                                                                                     | Symmetry reduction<br>$I_2$             |                                         |                                         |                                         |                              |                                     |                                     |                                          |                                           |                                           |                                           |                                           |                                           |                                           |                                           |                                           |                                           |
| $\text{Li}_5\text{V}[\text{PO}_4]_2\text{F}_2$<br>$P1\ 2_1/c1$ (no. 14)<br>$a = 6.3589 \text{ \AA}$<br>$b = 10.7795 \text{ \AA}$<br>$c = 10.3836 \text{ \AA}$<br>$b = 90.02^\circ$                  | Li5<br>4e<br>0.5070<br>0.3352<br>0.2687 | Li6<br>4e<br>0.0323<br>0.3357<br>0.2472 | Li3<br>4e<br>0.2592<br>0.5834<br>0.2285 | Li4<br>4e<br>0.2552<br>0.2763<br>0.4750 | Li2<br>2c<br>1/2<br>0<br>1/2 | Li1<br>2a<br>0<br>0<br>0            | Vi<br>2a<br>0<br>0<br>0             | O5<br>4e<br>0.4541<br>0.0134<br>0.3044   | O8<br>4e<br>0.06013<br>0.01826<br>0.31701 | O7<br>4e<br>0.26050<br>0.21791<br>0.28313 | O4<br>4e<br>0.75630<br>0.24439<br>0.17161 | O6<br>4e<br>0.23592<br>0.05587<br>0.10923 | O1<br>4e<br>0.23725<br>0.61931<br>0.02574 | O2<br>4e<br>0.55243<br>0.82422<br>0.46866 | O3<br>4e<br>0.55243<br>0.47144<br>0.46866 | F1<br>4e<br>0.22356<br>0.47144<br>0.36779 | F2<br>4e<br>0.21151<br>0.37695<br>0.05764 |
|                                                                                                                                                                                                     | Symmetry reduction<br>$I_2$             |                                         |                                         |                                         |                              |                                     |                                     |                                          |                                           |                                           |                                           |                                           |                                           |                                           |                                           |                                           |                                           |
| $\text{Li}_5\text{Cr}[\text{PO}_4]_2\text{F}_2$<br>$P1\ 2_1/c1$ (no. 14)<br>$a = 6.3135 \text{ \AA}$<br>$b = 10.7731 \text{ \AA}$<br>$c = 10.4050 \text{ \AA}$<br>$b = 89.91^\circ$                 | Li5<br>4e<br>0.479<br>0.330<br>0.2766   | Li6<br>4e<br>0.021<br>0.323<br>0.222    | Li3<br>4e<br>0.272<br>0.5913<br>0.2391  | Li4<br>4e<br>0.276<br>0.2754<br>0.4746  | Li2<br>2c<br>1/2<br>0<br>1/2 | Li1<br>2a<br>0<br>0<br>0            | Cr1<br>2a<br>0<br>0<br>0            | O5<br>4e<br>0.4610<br>0.0112<br>0.3052   | O8<br>4e<br>0.0624<br>0.0217<br>0.3154    | O7<br>4e<br>0.2528<br>0.2242<br>0.2799    | O4<br>4e<br>0.7394<br>0.2409<br>0.1799    | O6<br>4e<br>0.2533<br>0.0553<br>0.1142    | O1<br>4e<br>0.2511<br>0.6234<br>0.0254    | O2<br>4e<br>0.5408<br>0.8209<br>0.4646    | O3<br>4e<br>0.5408<br>0.3169<br>0.4646    | F1<br>4e<br>0.2276<br>0.4742<br>0.3720    | F2<br>4e<br>0.2134<br>0.3781<br>0.0566    |

**Figure S5.** Group-subgroup scheme in the Bärnighausen formalism [31, 32] for the structure of  $\text{Li}_2\text{Ni}[\text{PO}_4]\text{F}$  and comparison with  $\text{Li}_5M(\text{PO}_4)_2\text{F}_2$  ( $M = \text{V}$  and  $\text{Cr}$ ) structures. The indices of the *translationengleiche* ( $t$ ) transition, as well as the unit cell and origin shift transformations are given.

### 3.3.3. Effect of the Li/Na ratio on the compounds with the $\text{Li}_2\text{Ni}[\text{PO}_4]\text{F}$ -type structure

When the lithium is replaced by sodium in  $\text{Li}_2\text{Ni}[\text{PO}_4]\text{F}$ , one would expect an increase of the cell parameters due to the large difference between the ionic radii of  $\text{Li}^+$  and  $\text{Na}^+$ . However, we observed that only the  $a$  and  $c$  cell parameters increased, whereas  $b$  decreased. This phenomenon has been also observed in the cobalt and iron  $\text{Li}_{2-x}\text{Na}_x\text{M}[\text{PO}_4]\text{F}$ -5 systems (see the table in Fig. S6<sup>†</sup>). In order to explain the origin of this common behavior, projection views of the  $\text{Ni}_2\text{O}_3\text{F}$  infinite chains in  $\text{Li}_2\text{Ni}[\text{PO}_4]\text{F}$  and  $\text{Li}_{1.3}\text{Na}_{0.7}\text{Ni}[\text{PO}_4]\text{F}$  are depicted on Fig. S6b, c<sup>†</sup>, respectively. One can see clearly a significant tilt of the octahedra forming the  $\text{Ni}_2\text{O}_3\text{F}$  infinite chains, when the lithium is partially replaced by sodium. The directions of the tilts are represented by green arrows on Fig. S6b<sup>†</sup>. As a consequence of these tilts, we observe an increase of the  $\alpha_{\text{O}_4\text{-F}_1\text{-O}_4}$  angle from 148.84 to 160.37 °, a decrease of the  $d_{\text{O}_6\text{-O}_6\text{max}}$  distance from 3.795 to 10 3.693 Å, and an increase of the  $d_{\text{O}_6\text{-O}_6\text{min}}$  distance from 2.494 to 2.526 Å. This flattening of the  $\alpha_{\text{O}_4\text{-F}_1\text{-O}_4}$  angle should induce an increase of the  $d_{\text{Ni-Ni}}$  distance and the cell parameter  $b$ , since  $b = 2 \times d_{\text{Ni-Ni}}$ . This is in contradiction with experimental results which shows a decrease of cell parameter  $b$ . A more careful examination of the interatomic distances shows a decrease of the  $d_{\text{O}_4\text{-F}_1\text{max}}$  from 3.264 to 3.156 Å and an increase of  $d_{\text{O}_4\text{-F}_1\text{min}}$  from 2.509 to 2.654 Å. It is therefore concluded that when lithium is replaced by sodium atoms, the  $\text{Ni}_2\text{O}_3\text{F}$  infinite chains are first compressed along the  $b$ -axis 15 ( $d_{\text{O}_4\text{-F}_1\text{max}}$ ,  $d_{\text{Ni-Ni}}$ , and  $b$  decrease) inducing some strains, which could be reduced by a relaxation along [100] ( $d_{\text{O}_4\text{-F}_1\text{min}}$  and  $a$  increase) and a tilt of the  $\text{Ni}_2\text{O}_4\text{F}_2$  octahedra along [010] ( $\alpha_{\text{O}_4\text{-F}_1\text{-O}_4}$  and  $d_{\text{O}_6\text{-O}_6\text{min}}$  increase, whereas  $d_{\text{O}_6\text{-O}_6\text{max}}$  decreases). It is worth to mention that the  $\alpha_{\text{O}_4\text{-F}_1\text{-O}_4}$  angle is flexible and may reach 180 ° when the sodium content is increased. However, since O6-O6 corresponds to the edge of the  $\text{PO}_4$  tetrahedra, the increase of  $d_{\text{O}_6\text{-O}_6\text{min}}$  distance is limited. This restrains the increase of the  $\alpha_{\text{O}_4\text{-F}_1\text{-O}_4}$  angle and induces a structural transition to a layered  $\text{LiNaNi}[\text{PO}_4]\text{F}$  structure when a 20 critical  $d_{\text{O}_6\text{-O}_6\text{min}}$  distance is reached.<sup>11</sup> Similar to  $\text{Ni}_2\text{O}_3\text{F}$ , the  $\text{Ni}_1\text{O}_3\text{F}$  infinite chains are compressed along [010] ( $d_{\text{O}_5\text{-F}_2\text{max}}$ ,  $d_{\text{Ni-Ni}}$ , and  $b$  decrease) however, the  $\beta_{\text{O}_5\text{-F}_2\text{-O}_5}$  angle is less flattened than  $\alpha_{\text{O}_4\text{-F}_1\text{-O}_4}$  (see table in Fig. S7<sup>†</sup>). The flattening of the  $\alpha_{\text{O}_4\text{-F}_1\text{-O}_4}$  angle affects strongly the coordination sphere of the Li3 atom (Fig. S6a<sup>†</sup>), whereas the flattening of the  $\beta_{\text{O}_5\text{-F}_2\text{-O}_5}$  angle affects little the coordination sphere of the Li2 atom (Fig. S7a<sup>†</sup>). In the cobalt, iron and magnesium  $\text{Li}_{2-x}\text{Na}_x\text{M}[\text{PO}_4]\text{F}$ -systems, the same behaviors as in the nickel-system are observed, when Na replaces Li (see the table in 25 Fig. S6, 7<sup>†</sup>).

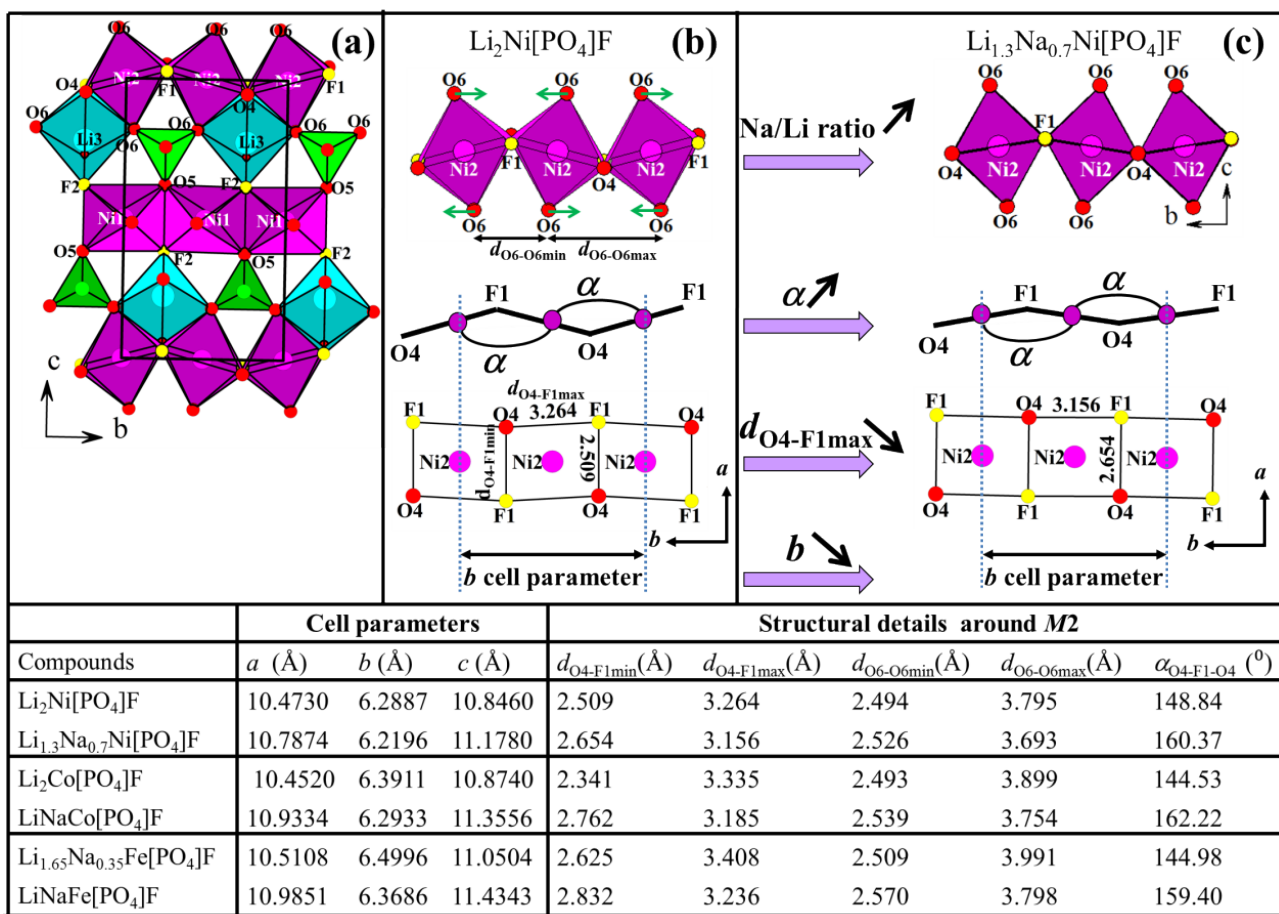

**Figure S6.** Projection view along [100] of the structure of  $\text{Li}_2\text{Ni}[\text{PO}_4]\text{F}$  (a), and views of the infinite chains  $\text{Ni}_2\text{O}_3\text{F}$ , in  $\text{Li}_2\text{Ni}[\text{PO}_4]\text{F}$  (b) and  $\text{Li}_{1.3}\text{Na}_{0.7}\text{Ni}[\text{PO}_4]\text{F}$  (c). Crystallographic details about the compounds with  $\text{Li}_2\text{Ni}[\text{PO}_4]\text{F}$ -type structure are reported in the table.

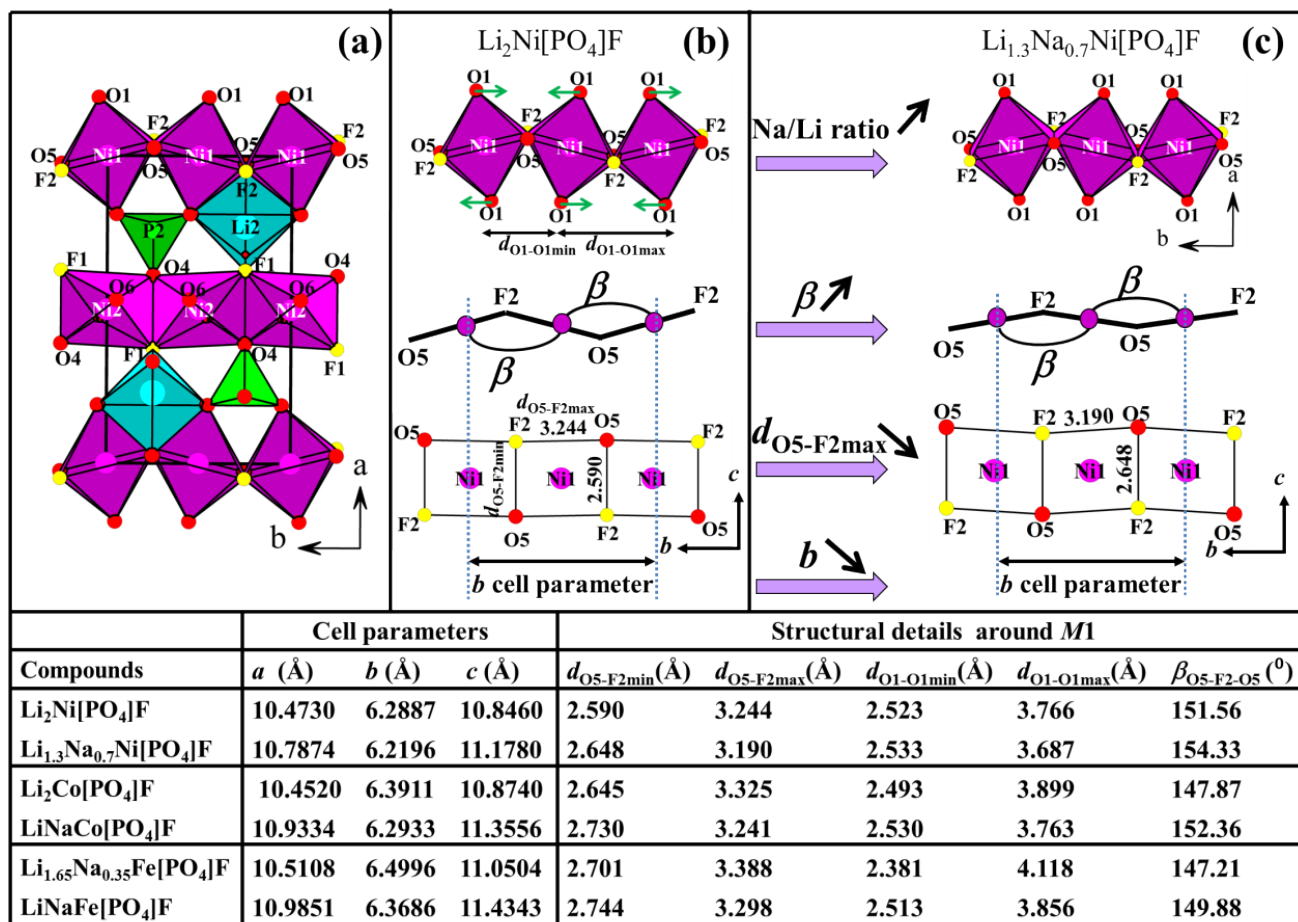

**Figure S7.** Projection view along [001] of the structure of  $\text{Li}_2\text{Ni}[\text{PO}_4]\text{F}$  (a), and views of the infinite chains  $\text{Ni}_1\text{O}_3\text{F}$ , in  $\text{Li}_2\text{Ni}[\text{PO}_4]\text{F}$  (b) and  $\text{Li}_{1.3}\text{Na}_{0.7}\text{Ni}[\text{PO}_4]\text{F}$ (c). Crystallographic details about the compounds with  $\text{Li}_2\text{Ni}[\text{PO}_4]\text{F}$ -type structure are reported in the table.

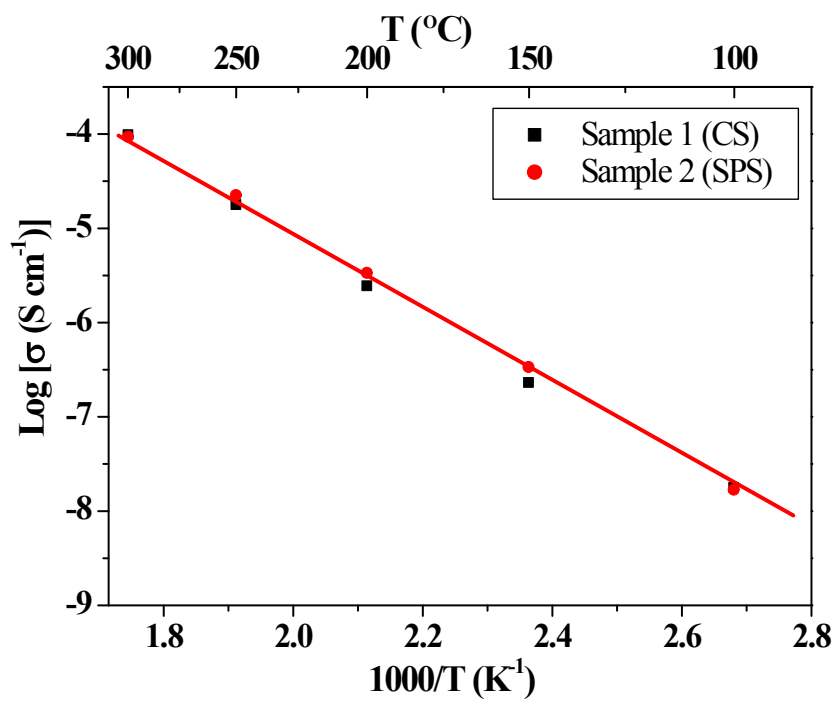

**Figure S8.** Arrhenius plot of the ionic conductivity  $\sigma$  of  $\text{Li}_9\text{Mg}_3[\text{PO}_4]_4\text{F}_3\Box_1$ , in air. Closed squares and open circles show samples of conventional and SPS sintering, respectively.



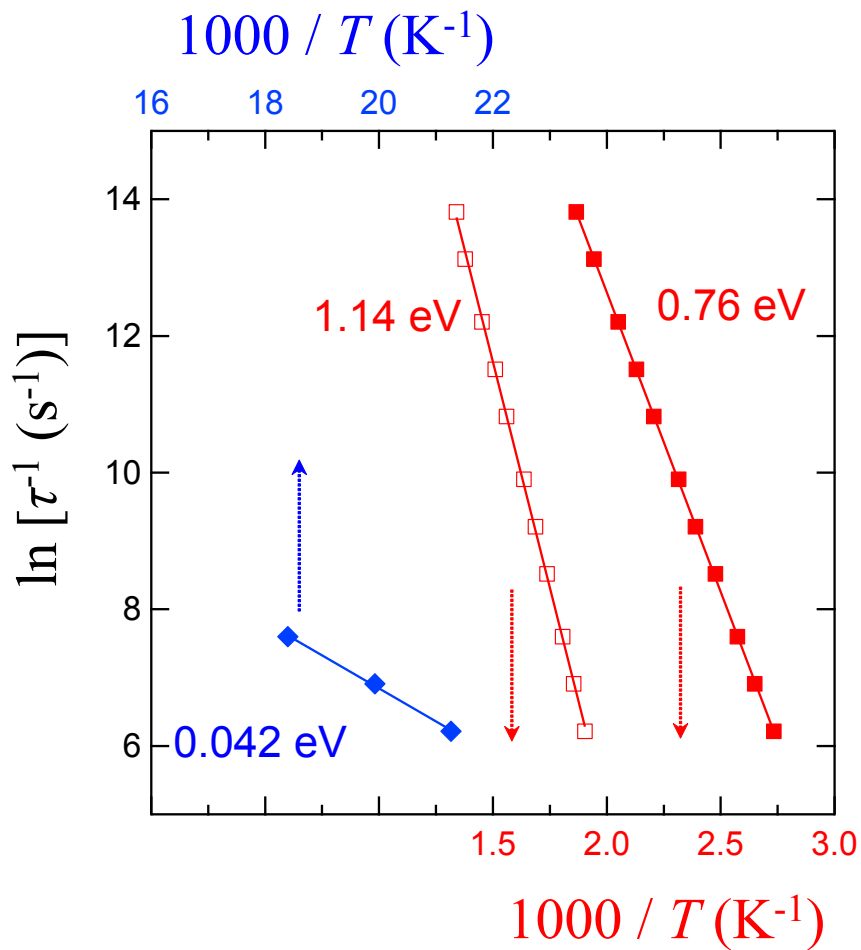

**Figure S9.** Arrhenius plots of the relaxation time  $\tau^{-1}$  of  $\text{Li}_9\text{Mg}_3[\text{PO}_4]_4\text{F}_3\Box_1$ . Red closed and open squares show motions of lithium ion and anion, *e.g.* oxide and/or fluoride ion, respectively. Blue closed diamond is conserved with a mode of defective origin.<sup>36</sup>

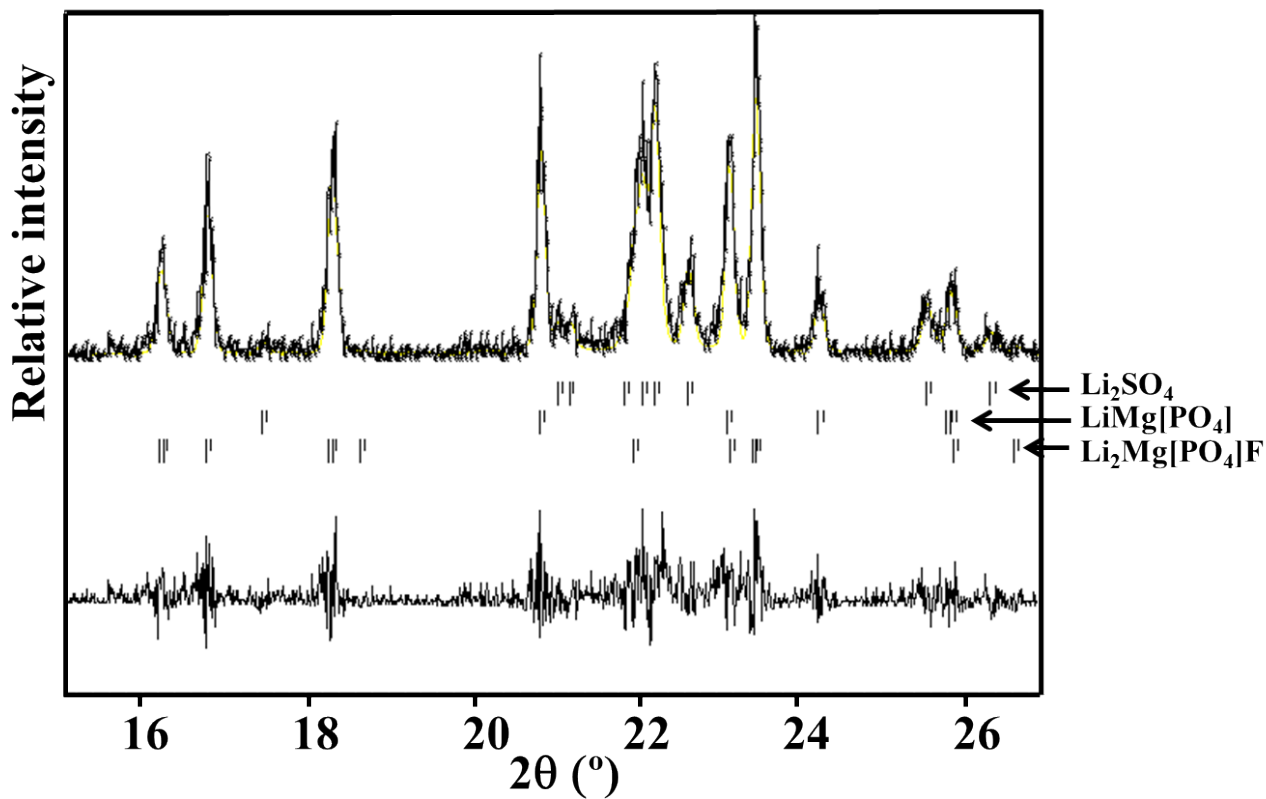

**Figure S10.** Observed, calculated and difference plots for the XRPD (Cu- $K\alpha$ ) radiation) profile refinement of the composite  $\text{Li}_6\text{Mg}_4[\text{PO}_4]_3[\text{SO}_4]\text{F}_3$  material. The three phases  $\text{Li}_2\text{SO}_4$ ,  $\text{LiMg}[\text{PO}_4]$  and  $\text{Li}_2\text{Mg}[\text{PO}_4]\text{F}$  clearly coexist.

**Table S1.** Anisotropic ADPs ( $\text{\AA}^2$ ) for  $\text{Li}_2\text{Mg}[\text{PO}_4]\text{F}$  and  $\text{Li}_9\text{Mg}_3[\text{PO}_4]_4\text{F}_3$ . The anisotropic ADPfactor exponent takes the form:  $-2\pi^2[(ha^*)^2U_{11}+\dots+2hka^*b^*U_{12}]$ .

| Atom                                                                | $U_{11}$   | $U_{22}$   | $U_{33}$   | $U_{12}$     | $U_{13}$     | $U_{23}$     |
|---------------------------------------------------------------------|------------|------------|------------|--------------|--------------|--------------|
| <b><math>\text{Li}_2\text{Mg}[\text{PO}_4]\text{F}</math></b>       |            |            |            |              |              |              |
| Li1                                                                 | 0.0382(15) | 0.0345(18) | 0.0253(14) | 0.0087(10)   | 0.0047(9)    | 0.0079(10)   |
| Li2                                                                 | 0.0143(13) | 0.0137(14) | 0.0141(13) | 0            | 0.0017(9)    | 0            |
| Li3/Mg3                                                             | 0.0266(13) | 0.0043(9)  | 0.0145(9)  | 0            | -0.0023(8)   | 0            |
| Mg1                                                                 | 0.0093(3)  | 0.0100(3)  | 0.0085(3)  | -0.00051(19) | -0.00085(15) | 0.00112(15)  |
| Mg22/Li22                                                           | 0.0088(3)  | 0.0081(3)  | 0.0043(3)  | 0.00049(19)  | 0.00032(15)  | -0.00042(15) |
| P1                                                                  | 0.0110(2)  | 0.0091(2)  | 0.0055(2)  | 0            | 0.00110(11)  | 0            |
| P2                                                                  | 0.0067(2)  | 0.0087(2)  | 0.0080(2)  | 0            | 0.00035(11)  | 0            |
| O1                                                                  | 0.0096(4)  | 0.0102(3)  | 0.0166(4)  | -0.0013(3)   | -0.0020(2)   | -0.0014(3)   |
| O2                                                                  | 0.0168(6)  | 0.0180(5)  | 0.0090(5)  | 0            | 0.0023(4)    | 0            |
| O3                                                                  | 0.0113(6)  | 0.0262(6)  | 0.0131(5)  | 0            | 0.0022(4)    | 0            |
| O4                                                                  | 0.0081(5)  | 0.0106(4)  | 0.0171(5)  | 0            | 0.0028(4)    | 0            |
| O5                                                                  | 0.0134(5)  | 0.0105(5)  | 0.0066(4)  | 0            | -0.0001(3)   | 0            |
| O6                                                                  | 0.0224(4)  | 0.0097(4)  | 0.0082(3)  | 0.0019(3)    | 0.0007(3)    | 0.0011(3)    |
| F1                                                                  | 0.0104(5)  | 0.0138(4)  | 0.0182(4)  | 0            | -0.0025(3)   | 0            |
| F2                                                                  | 0.0173(5)  | 0.0146(4)  | 0.0107(4)  | 0            | 0.0001(3)    | 0            |
| <b><math>\text{Li}_9\text{Mg}_3[\text{PO}_4]_4\text{F}_3</math></b> |            |            |            |              |              |              |
| Li1                                                                 | 0.013(3)   | 0.021(3)   | 0.021(3)   | 0.0043(17)   | 0.002(2)     | 0.007(2)     |
| Li2                                                                 | 0.035(3)   | 0.021(2)   | 0.017(3)   | 0.008(3)     | 0.003(3)     | -0.0047(19)  |
| Li3                                                                 | 0.0028(17) | 0.003(2)   | 0.0064(17) | -0.0010(13)  | 0.0020(18)   | 0.002(2)     |
| Mg1                                                                 | 0.0090(3)  | 0.0082(4)  | 0.0102(4)  | 0.0044(3)    | -0.0001(5)   | 0.0000(4)    |
| P1                                                                  | 0.0085(3)  | 0.0067(3)  | 0.0086(3)  | 0.00422(19)  | 0.0001(3)    | 0.0003(4)    |
| P2                                                                  | 0.0073(3)  | 0.0073(3)  | 0.0085(6)  | 0.00366(15)  | 0            | 0            |
| O1                                                                  | 0.0110(10) | 0.0104(9)  | 0.0120(8)  | 0.0069(6)    | 0.0006(8)    | 0.0015(8)    |
| O2                                                                  | 0.0093(8)  | 0.0130(9)  | 0.0165(9)  | 0.0055(9)    | 0.0009(7)    | -0.0008(12)  |
| O3                                                                  | 0.0161(10) | 0.0106(9)  | 0.0116(9)  | 0.0082(8)    | -0.0010(7)   | -0.0014(7)   |
| O4                                                                  | 0.0172(10) | 0.0098(9)  | 0.0111(11) | 0.0068(8)    | -0.0035(8)   | -0.0032(7)   |
| O5                                                                  | 0.0138(8)  | 0.0109(8)  | 0.0103(8)  | 0.0063(7)    | 0.0020(7)    | 0.0009(9)    |
| O6                                                                  | 0.0141(9)  | 0.0141(9)  | 0.0117(14) | 0.0070(5)    | 0            | 0            |
| F1                                                                  | 0.0115(8)  | 0.0111(6)  | 0.0132(6)  | 0.0036(6)    | 0.0029(7)    | 0.0007(5)    |

**Table S2.** Comparison of the crystallographic data of  $\text{Li}_9\text{Mg}_3[\text{PO}_4]_4\text{F}_3\Box_1$  and  $\text{Na}_8\text{Mn}_4[\text{PO}_4]_4\text{F}_4$  after lowering the symmetries from  $P6_3$  and  $P2_1/c$  to  $P2_1$ , respectively. The main differences are highlighted in red.

| <b><math>\text{Li}_9\text{Mg}_3[\text{PO}_4]_4\text{F}_3\Box_1</math> [Space group : <math>P2_1</math> (No. 4)]</b><br>$a = 12.6159(6) \text{ \AA}$ , $b = 5.0082(4) \text{ \AA}$ , $c = 12.6159(6) \text{ \AA}$ ,<br>$\beta = 120^\circ$ , $V = 690.32(7) \text{ \AA}^3$ , $Z = 2$ |                |                |                | <b><math>\text{Na}_8\text{Mn}_4[\text{PO}_4]_4\text{F}_4</math> [Space group : <math>P2_1</math> (No. 4)]</b><br>$a = 13.6830 \text{ \AA}$ , $b = 5.3170 \text{ \AA}$ , $c = 13.7683 \text{ \AA}$<br>$\beta = 120.04^\circ$ , $V = 867.13 \text{ \AA}^3$ , $Z = 2$ |                |                |                |
|-------------------------------------------------------------------------------------------------------------------------------------------------------------------------------------------------------------------------------------------------------------------------------------|----------------|----------------|----------------|--------------------------------------------------------------------------------------------------------------------------------------------------------------------------------------------------------------------------------------------------------------------|----------------|----------------|----------------|
| <b>Atom</b>                                                                                                                                                                                                                                                                         | <b>x</b>       | <b>y</b>       | <b>z</b>       | <b>Atom</b>                                                                                                                                                                                                                                                        | <b>x</b>       | <b>y</b>       | <b>z</b>       |
| Li1a                                                                                                                                                                                                                                                                                | 0.91596        | 0.34609        | 0.08346        | Na1_2                                                                                                                                                                                                                                                              | 0.92016        | 0.26170        | 0.08350        |
| Li1b                                                                                                                                                                                                                                                                                | 0.83250        | 0.84609        | 0.91596        | Na4_2                                                                                                                                                                                                                                                              | 0.83455        | 0.73700        | 0.92191        |
| <b>Li1c</b>                                                                                                                                                                                                                                                                         | 0.91654        | 0.34609        | 0.83250        | <b>Mn2_2</b>                                                                                                                                                                                                                                                       | 0.92356        | 0.22901        | 0.85041        |
| Li2a                                                                                                                                                                                                                                                                                | 0.82524        | 0.79962        | 0.42936        | Na4_1                                                                                                                                                                                                                                                              | 0.83455        | 0.76300        | 0.42191        |
| Li2b                                                                                                                                                                                                                                                                                | 0.60412        | 0.79962        | 0.17476        | Na2_2                                                                                                                                                                                                                                                              | 0.58023        | 0.75620        | 0.16325        |
| <b>Li2c</b>                                                                                                                                                                                                                                                                         | 0.57064        | 0.79962        | 0.39588        | <b>Mn1_1</b>                                                                                                                                                                                                                                                       | 0.57610        | 0.77224        | 0.42666        |
| Li3a                                                                                                                                                                                                                                                                                | 0.91379        | 0.27109        | 0.57909        | Na1_1                                                                                                                                                                                                                                                              | 0.92016        | 0.23830        | 0.58350        |
| Li3b                                                                                                                                                                                                                                                                                | 0.66530        | 0.27109        | 0.08621        | Na3_2                                                                                                                                                                                                                                                              | 0.66608        | 0.25860        | 0.08680        |
| Li3c                                                                                                                                                                                                                                                                                | 0.42091        | 0.27109        | 0.33470        | Na2_1                                                                                                                                                                                                                                                              | 0.41977        | 0.24380        | 0.33675        |
| Mg1a                                                                                                                                                                                                                                                                                | 0.93254        | 0.26874        | 0.35849        | Mn2_1                                                                                                                                                                                                                                                              | 0.92356        | 0.27099        | 0.35041        |
| Mg1b                                                                                                                                                                                                                                                                                | 0.42594        | 0.26874        | 0.06745        | Mn1_2                                                                                                                                                                                                                                                              | 0.42390        | 0.22776        | 0.07334        |
| <b>Mg1c</b>                                                                                                                                                                                                                                                                         | 0.64152        | 0.26874        | 0.57406        | <b>Na3_1</b>                                                                                                                                                                                                                                                       | 0.66608        | 0.24140        | 0.58680        |
| P1b                                                                                                                                                                                                                                                                                 | 0.84677        | 0.75424        | 0.16576        | P2_2                                                                                                                                                                                                                                                               | 0.83782        | 0.78350        | 0.17335        |
| O2b                                                                                                                                                                                                                                                                                 | 0.90816        | 0.75313        | 0.08608        | O5_2                                                                                                                                                                                                                                                               | 0.90370        | 0.70190        | 0.11520        |
| O5b                                                                                                                                                                                                                                                                                 | <b>0.83408</b> | <b>0.45809</b> | <b>0.19409</b> | O4_1                                                                                                                                                                                                                                                               | <b>0.85110</b> | <b>0.07170</b> | <b>0.19420</b> |
| O4b                                                                                                                                                                                                                                                                                 | <b>0.92631</b> | <b>0.90619</b> | <b>0.28440</b> | O1_1                                                                                                                                                                                                                                                               | <b>0.88340</b> | <b>0.64650</b> | <b>0.28620</b> |
| O3b                                                                                                                                                                                                                                                                                 | <b>0.71920</b> | <b>0.88192</b> | <b>0.09711</b> | O6_2                                                                                                                                                                                                                                                               | <b>0.71190</b> | <b>0.72140</b> | <b>0.09830</b> |
| P2                                                                                                                                                                                                                                                                                  | 0.33333        | 0.79544        | 0.66667        | P1_1                                                                                                                                                                                                                                                               | 0.33795        | 0.78560        | 0.66529        |
| O1c                                                                                                                                                                                                                                                                                 | 0.59815        | 0.18600        | 0.20247        | O2_2                                                                                                                                                                                                                                                               | 0.59730        | 0.21450        | 0.21010        |
| O1b                                                                                                                                                                                                                                                                                 | 0.79753        | 0.18600        | 0.39568        | O8_1                                                                                                                                                                                                                                                               | 0.78750        | 0.22010        | 0.38520        |
| O1a                                                                                                                                                                                                                                                                                 | 0.60432        | 0.18600        | 0.40185        | O3_1                                                                                                                                                                                                                                                               | 0.61400        | 0.14660        | 0.39900        |
| O6                                                                                                                                                                                                                                                                                  | 0.66667        | 0.60217        | 0.33333        | O7_1                                                                                                                                                                                                                                                               | 0.65150        | 0.57390        | 0.34630        |
| P1a                                                                                                                                                                                                                                                                                 | 0.83424        | 0.75424        | 0.68101        | P2_1                                                                                                                                                                                                                                                               | 0.83782        | 0.71650        | 0.67335        |
| O3a                                                                                                                                                                                                                                                                                 | 0.90289        | 0.88192        | 0.62208        | O5_1                                                                                                                                                                                                                                                               | 0.90370        | 0.79810        | 0.61520        |
| O5a                                                                                                                                                                                                                                                                                 | 0.80591        | 0.45809        | 0.63999        | O4_2                                                                                                                                                                                                                                                               | 0.85110        | 0.42830        | 0.69420        |
| O2a                                                                                                                                                                                                                                                                                 | 0.91392        | 0.75313        | 0.82209        | O1_2                                                                                                                                                                                                                                                               | 0.88340        | 0.85350        | 0.78620        |
| O4a                                                                                                                                                                                                                                                                                 | 0.71560        | 0.90619        | 0.64191        | O6_1                                                                                                                                                                                                                                                               | 0.88340        | 0.85350        | 0.78620        |
| P1c                                                                                                                                                                                                                                                                                 | 0.68101        | 0.25424        | 0.84677        | P1_2                                                                                                                                                                                                                                                               | 0.66205        | 0.21440        | 0.83471        |
| O3c                                                                                                                                                                                                                                                                                 | 0.62208        | 0.38192        | 0.71920        | O2_1                                                                                                                                                                                                                                                               | 0.59730        | 0.28550        | 0.71010        |
| O4c                                                                                                                                                                                                                                                                                 | 0.64191        | 0.40619        | 0.92631        | O3_2                                                                                                                                                                                                                                                               | 0.61400        | 0.35340        | 0.89900        |
| O2c                                                                                                                                                                                                                                                                                 | 0.82209        | 0.25313        | 0.90816        | O8_2                                                                                                                                                                                                                                                               | 0.78750        | 0.27990        | 0.88520        |
| O5c                                                                                                                                                                                                                                                                                 | 0.63999        | -0.04191       | 0.83408        | O7_2                                                                                                                                                                                                                                                               | 0.65150        | -0.07390       | 0.84630        |
| F1a                                                                                                                                                                                                                                                                                 | 0.03892        | 0.07408        | 0.52264        | F1_1                                                                                                                                                                                                                                                               | 0.00030        | 0.00040        | 0.48680        |
| F1b                                                                                                                                                                                                                                                                                 | 0.51628        | 0.57408        | 0.03892        | F2_2                                                                                                                                                                                                                                                               | 0.49270        | 0.50160        | 0.00860        |
| F1c                                                                                                                                                                                                                                                                                 | 0.47736        | 0.07408        | 0.51628        | F2_1                                                                                                                                                                                                                                                               | 0.49270        | -0.00160       | 0.50860        |
| <b>Vacant</b>                                                                                                                                                                                                                                                                       | -              | -              | -              | <b>F1_2</b>                                                                                                                                                                                                                                                        | 0.00030        | 0.49960        | 0.98680        |
